# Supplementary material
Source: Springer Nature journal article supplement (https://www.springermedizin.de/resource/supplementary/12891_2012_1660_MOESM1_ESM.pdf/9507810)

### Databases Search

Based on literature review by Kersten et al. using a combination of key concepts (appendix 1) [13]

- 1- Search terms relevant to musculoskeletal disorders
- 2- Search terms relevant to diagnostic, prescribing and primary care
- 3- Search terms relevant to advanced practice
- 4- Search terms relevant to emergency service
- 5- Search terms relevant to physiotherapy

#### 2 search strategies:

- 1- 1 AND 2 AND 5
- 2- (3 OR 4) AND 5

**Dates:** January 1980 to November 2011

**Other:** Hand searches of previous systematic reviews and retrieved study reference lists

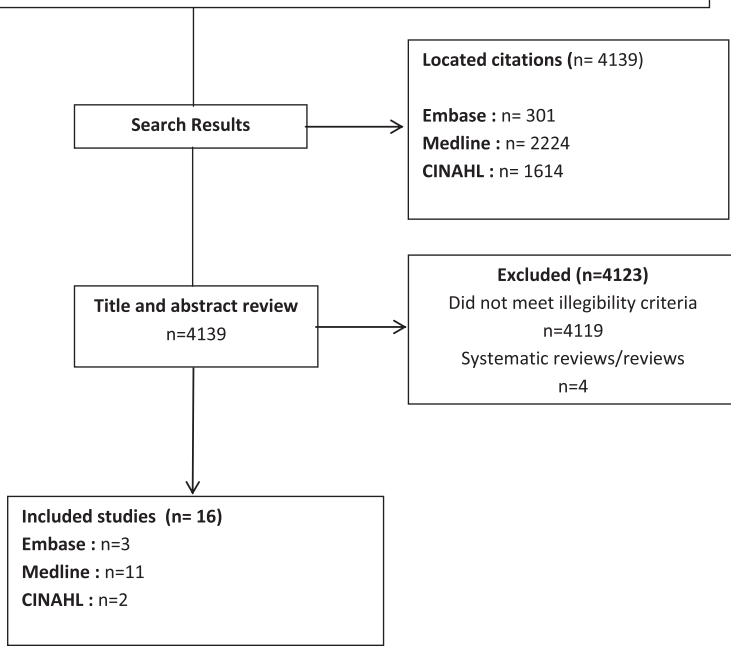

Supplement: MOESM1 [file 9507810]
